# Supplementary material for: Dynamic regulation of the Trypanosoma brucei transferrin receptor in response to iron starvation is mediated via the 3’UTR
Source: PubMed Central journal article supplement (PMC6312234; doi:10.1371/journal.pone.0206332), 2018-12-31
Supplement: pone.0206332.s001.pdf [file pone.0206332.s001.pdf]

**Dynamic regulation of the *Trypanosoma brucei* transferrin receptor in response to iron starvation is mediated *via* the 3'UTR**

Corinna Benz, Winston Lo, Nadin Fathallah, Ashley Connor-Guscott, Henry Benns, Michael D Urbaniak\*

Biomedical and Life Sciences, Faculty of Health and Medicine, Lancaster University, Lancaster LA1 4YG, UK

\* Corresponding author. E-mail: [m.urbania@lancaster.ac.uk](mailto:m.urbania@lancaster.ac.uk)

**Supplementary data**

Figure A. Sequence alignment of the BES ESAG6 3'UTRs.

Figure B. Sequence alignment of the BES and putative genomic ESAG6 3'UTRs.

Figure C. Extensive secondary structure is predicted in the *ESAG6*-3'UTR.



```

BES1.ESAG6-3_UTR      GGGAAAGGATGCGACCGAACTGCGCTGCTTAGCGTGAAAGATTATGGTAATGGAGGGTTGGGAAA-GATTGGGGAAACAA
BES2.ESAG63_UTR      AGGAAGGATGCGACAGAACTGCGCTGCTTAGCTGAAAGATTATGGTAATGGAGGGTTGTGAAA-GATTGGGGAAACAA
BES3.ESAG6-3_UTR      AGGAAGGATGCGACCGAACTGCGCTGCTTAGCGTGAAAGATTATGGTAATGGAGGGTTGGGAAAAATCGGTGAAACAA
BES4.ESAG6-3_UTR      AGGAAGGATGCGACAGAACTGCGCTGCTTAGCGTGAAAGATTATGGTAATGGAGGGTTGTGAAA-GATTGGGGAAACAA
BES5.ESAG6-3_UTR      AGGAAGGATGCGACAGAACTGCGCTGCTTAGCGTGAAAGATTATGGTAATGGAGGGTTGTGAAA-GATTGGGGAAACAA
BES7.ESAG6-3_UTR      GGGAAAGGATGCGACCGAACTGCGCTGCTTAGCGTGAAAGATTATGGTAATGGAGGGTTGGGAAA-GATTGGGGAAACAA
BES10.ESAG6-3_UTR    AGGAAGGATGCGACCGAACTGCGCTGCTTAGCGTGAAAGATTATGGTAATGGAGGGTTGGGAAAAATCGGTGAAACAA
BES11.ESAG6-3_UTR    GGGAAAGGATGCGACCGAACTGCGCTGCTTAGCGTGAAAGATTATGGTAATGGAGGGTTGGGAAAAATCGGTGAAACAA
BES12.ESAG6-3_UTR    GGGAAAGGATGCGACCGAACTGCGCTGCTTAGCGTGAAAGATTATGGTAATGGAGGGTTGGGAAA-GATTGGGGAAACAA
BES13.ESAG6-3_UTR    GGGAAAGGATGCGACCGAACTGCGCTGCTTAGCGTGAAAGATTATGGTAATGGAGGGTTGGGAAA-GATTGGGGAAACAA
BES14.ESAG6-3_UTR    AGGAAGGATGCGACCGAACTGCGCTGCTTAGCGTGAAAGATTATGGTAATGGAGGGTTGGGAAA-GATTGGGGAAACAA
BES15.ESAG6-3_UTR    GGGAAAGGATGCGACCGAACTGCGCTGCTTAGCGTGAAAGATTATGGTAATGGAGGGTTGGGAAA-GATTGGGGAAACAA
BES17.ESAG6-3_UTR    AGGAAGGATGCGACCGAACTGCGCTGCTTAGCGTGAAAGATTATGGTAATGGAGGGTTGGGAAAAATCGGTGAAACAA
Tb927.9.15680-3_UTR  TGT--GAATGTAAAAGAAGTA--ACTGGCTGATAT-ACATTGATCTCTTG---TATTGGTAGAGCTCG-CCATTTTG
*   *   *   *   *   *   *   *   *   *   *   *   *   *   *   *   *   *   *   *   *   *

BES1.ESAG6-3_UTR      ATACCTATTTCTTT---TATTTGGGGAAACAAATGGGCAAAAGTAACG--TAAGTTTCCAGTGGGAGTGGTATGTGTGTG
BES2.ESAG63_UTR      AAACCTATTTCTTT---TATTTGGGGAAACAAATGGGCAAAAGTAACG--TAAGTTTCCAGTGGGAGTGGTATGTGTGTG
BES3.ESAG6-3_UTR      ATACCTATTTCTTT---TATTTGGGGAAACAAATGGGCAAAAGTAACG--TAAGTTTCCAGCGGGAGTGGTATGT--GTG
BES4.ESAG6-3_UTR      AAACCTATTTCTTT---TATTTGGGGAAACAAATGGGCAAAAGTAACG--TAAGTTTCCAGTGGGAGTGGTATGTGTG
BES5.ESAG6-3_UTR      AAACCTATTTCTTT---TATTTGGGGAAACAAATGGGCAAAAGTAACG--TAAGTTTCCAGTGGGAGTGGTATGTGTGTG
BES7.ESAG6-3_UTR      ATACCTATTTCTTT---TATTTGGGGAAACAAATGGGCAAAAGTAACG--TAAGTTTCCAGCGGGAGTGGT--T--GTG
BES10.ESAG6-3_UTR    ATACCTATTTCTTT---TATTTGGGGAAACAAATGGGCAAAAGTAACG--TAAGTTTCCAGCGGGAGTGGTATGT--GTG
BES11.ESAG6-3_UTR    ATACCTATTTCTTT---TATTTGGGGAAACAAATGGGCAAAAGTAACG--TAAGTTTCCAGCGGTAGTGGTG--T--GTG
BES12.ESAG6-3_UTR    AAACCTATTTCTTT---TATTTGGGGAAACAAATGGGCAAAAGTAACG--TAAGTTTCCAGCGGGAGTGGTATGT--GTG
BES13.ESAG6-3_UTR    AAACCTATTTCTTT---TATTTGGGGAAACAAATGGGCAAAAGTAACG--TGAGTTTCCAGCGGGAGTGGTGTGT--GTG
BES14.ESAG6-3_UTR    AAACCTATTTCTTT---TATTTGGGGAAACAAATGGGCAAAAGTAACG--TAAGTTTCCAGTGGGAGTGGTATGTGTGTG
BES15.ESAG6-3_UTR    AAACCTATTTCTTT---TATTTGGGGAAACAAATGGGCAAAAGTAACG--TAAGTTTCCAGCGGGAGTGGTGTGT--GTG
BES17.ESAG6-3_UTR    ATACCTATTTCTTT---TATTTGGGGAAACAAATGGGCAAAAGTAACG--TAAGTTTCCAGCGGGAGTGGTATGT--GTG
Tb927.9.15680-3_UTR  CAGCCTATGCGTGCCACAACATCTGTACCCTGTGTA-ACAAGTGAAGTTCCAGTTTACCTTGGTCATTGCATTT--AAC
***** * * * * * * * * * * * * * * * * * * * * * * * * * * * * * * * * * * * * * * * *

BES1.ESAG6-3_UTR      TGT-ATGGGGCTGGCTAAGGAA-AGATGTGAGTTCGGCATGTGGTA-TGT-ACAAGTACGAAAACGTGTGAAACAAAAC
BES2.ESAG63_UTR      TGT-ATGGGGCTGGCTAAGGAA-AGATGTGAGTTCGGCATGTGGTA-TGT-ACAAGTACGAAAACGTGTGAAACAAAAC
BES3.ESAG6-3_UTR      TGT-ATGGGGCTGGCTAAGGAA-AGATGTGAGTTCGGCATGTGGTA-TGT-ACAAGTACGAAAACGTGTGAAACAAAAC
BES4.ESAG6-3_UTR      TGT-ATGGGGCTGGCTAAGGAA-AGATGTGAGTTCGGCATGTGGTA-TGT-ACAAGTACGAAAACGTGTGAAACAAAAC
BES5.ESAG6-3_UTR      TGT-ATGGGGCTGGCTAAGGAA-AGATGTGAGTTCGGCATGTGGTA-TGT-ACAAGTACGAAAACGTGTGAAACAAAAC
BES7.ESAG6-3_UTR      TGC-ATGGGGCTGGCTAAGGAA-AGATGTGAGTTCGGCATGTGGTA-TGT-ACAAGTACGAAAACGTGTGAAACAAAAC
BES10.ESAG6-3_UTR    TGT-ATGGGGCTGGCTAAGGAA-AGATGTGAGTTCGGCATGTGGTA-TGT-ACAAGTACGAAAACGTGTGAAACAAAAC
BES11.ESAG6-3_UTR    TGT-ATGGGGCTGGCTAAGGAA-AGATGTGAGTTCGGCATGTGGTA-TAT-ACAAGTACGAAAACGTGTGAAACAAAAC
BES12.ESAG6-3_UTR    TGT-ATGGGGCTGGCTAAGGAA-AGATGTGAGTTCGGCATGTGGTA-TGT-ACAAGTACGAAAACGTGTGAAACAAAAC
BES13.ESAG6-3_UTR    TGC-ATGGGGCTGACTAAGGAA-AGATGTGAGTTCGGCATGTGGTA-TGT-ACAAGTACGAAAACGTGTGAAACAAAAC
BES14.ESAG6-3_UTR    TGT-ATGGGGCTGGCTAAGGAA-AGATGTGAGTTCGGCATGTGGTA-TGT-ACAAGTACGAAAACGTGTGAAACAAAAC
BES15.ESAG6-3_UTR    TGC-ATGGGGCTGGCTAAGGAA-AGATGTGAGTTCGGCATGTGGTA-TGT-ACAAGTACGAAAACGTGTGAAACAAAAC
BES17.ESAG6-3_UTR    TGT-ATGGGGCTGGCTAAGGAA-AGATGTGAGTTCGGCATGTGGTA-TGT-ACAAGTACGAAAACGTGTGAAACAAAAC
Tb927.9.15680-3_UTR  TTTCCTAAACCT--CCATCCACATCTGTGC-ACTCCGCCAACTGTAGCGCGGGAAGTGTGTAATAATGTGAATCTCATT
*   *   *   *   *   *   *   *   *   *   *   *   *   *   *   *   *   *   *   *   *   *

BES1.ESAG6-3_UTR      GA----GATGTAAGGGGAAAATGTAACAACCAACTATGTTAAATT-TCAG--GAGACTATTTTCAAATT----TAGTT
BES2.ESAG63_UTR      GA----GATGTAAGGGGAAAATGTAACAACCAACTATGTTAAATT-TCAG--GAGACTATTTTCAAATT----TAGTT
BES3.ESAG6-3_UTR      GA----GTTATAAGGGGAAAATGTAACAACCAACTTGTGTAATTTTCAG--GATACTATTTTCAAATT----TAGTT
BES4.ESAG6-3_UTR      GA----GATGTAAGGGGAAAATGTAACAACCAACTATGTTAAATT-TCAG--GAGACTATTTTCAAATT----TAGTT
BES5.ESAG6-3_UTR      GA----GATGTAAGGGGAAAATGTAACAACCAACTATGTTAAATT-TCAG--GAGACTATTTTCAAATT----TAGTT
BES7.ESAG6-3_UTR      GA----GATGTAAGGGGAAAATGTAACAACCAACTATGTTAAATT-TCAG--GAGACTATTTTCAAATT----TAGTT
BES10.ESAG6-3_UTR    GA----GTTATAAGGGGAAAATGTAACAACCAACTATGTTAAATT-TTAG--GATACTATTTTCAAATT----TAGTT
BES11.ESAG6-3_UTR    GA----GATGTAAGGGGAAAATGTAACAACCAACTATGTTAAATT-TCAG--GAGACTATTTTCAAATT----TAGTT
BES12.ESAG6-3_UTR    GA----TATGTAAGGGGAAAATGTAACAACCAACTATGTTAAATT-TCAG--GAGACTATTTTCAAATT----TAGTT
BES13.ESAG6-3_UTR    GA----TATGTAAGGGGAAAATGTAACAACCAACTATGTTAAATT-TCAG--GAGACTATTTTCAAATT----TAGTT
BES14.ESAG6-3_UTR    GA----GATGTAAGGGGAAAATGTAACAACCAACTATGTTAAATT-TTAG--GAGACTATTTTCAAATT----TAGTT
BES15.ESAG6-3_UTR    GA----GATGTAAGGGGAAAATGTAACAACCAACTATGTTAAATT-TCAG--GAGACTATTTTCAAATT----TAGTT
BES17.ESAG6-3_UTR    GA----GTTATAAGGGGAAAATGTAACAACCAACTTGTGTAATTTTCAG--GATACTATTTTCAAATT----TAGTT
Tb927.9.15680-3_UTR  GCATCCTTTTGAATCCGACTTTCTT--GGTCCACGCAAG-CATGGG-TCAG--AAAGCATTTTAGCCAACCTCGGAAGTC
*   *   *   *   *   *   *   *   *   *   *   *   *   *   *   *   *   *   *   *   *   *

BES1.ESAG6-3_UTR      ACAACAAAGTAAATGTCAAATAATGCCAATAT--AAAGGAAA-----A
BES2.ESAG63_UTR      ACAACAAAGTAAATGTCAAATAATGCCAATAT--AAAGGAAAACCTAG----AC
BES3.ESAG6-3_UTR      ACAACAAAGTAAATGTCAAATAAAGCCAACTAT--AAAAGAAAACCTAG----A
BES4.ESAG6-3_UTR      ACAACAAAGTAAATGTCAAATAATGCCAATAT--AAAGGAAAACCTAG----A
BES5.ESAG6-3_UTR      ACAACAAAGTAAATGTCAAATAATGCCAATAT--AAAGGAAAACCTAG----A
BES7.ESAG6-3_UTR      ACAACAAAGTAAATGTCAAATAATGCCAATAT--AAAGGAAAACCTAGACTAA
BES10.ESAG6-3_UTR    ACAACAAAGTAAATGTCAAATAATGCCAATAT--AAAAGAAAACCTAG---C
BES11.ESAG6-3_UTR    ACAACACAGTAAATGTCAAATAATGCCAATAT--AAAGGAAAACCTAG---A
BES12.ESAG6-3_UTR    ACAACAAAGTAAATGTCAAATAATGCCAATAT--AAAGGAAAACCTAG---CT
BES13.ESAG6-3_UTR    ACAACAAAGTAAATGTCAAATAATGCCAATAT--AAAGGAAAACCTAG---CT
BES14.ESAG6-3_UTR    ACAACAAAGTAAATGTCAAATAATGCCAATAT--AAAGGAAAACCTAG----A
BES15.ESAG6-3_UTR    ACAACAAAGTAAATGTCAAATAATGCCAATAT--AAAGGAAAACCTAG----A
BES17.ESAG6-3_UTR    ACAACAAAGTAAATGTCAAATAATGCCAATAT--AAAAGAAAACCTAG----A
Tb927.9.15680-3_UTR  ACAACAAAGGAACTCATAAAAAGAGCTCCTTCCCTCCCTGGTA--C--A----G
***** * * * * * * * * * * * * * * * * * * * * * * * * * * * * * * * * * * * * * * * *

```

**Figure B. Sequence alignment of the BES and putative non-telomeric ESAG6 3'UTRs.** The sequence identity is indicated by stars below the sequence. Sequences immediately downstream of the stop codon were aligned with T-Coffee [1]

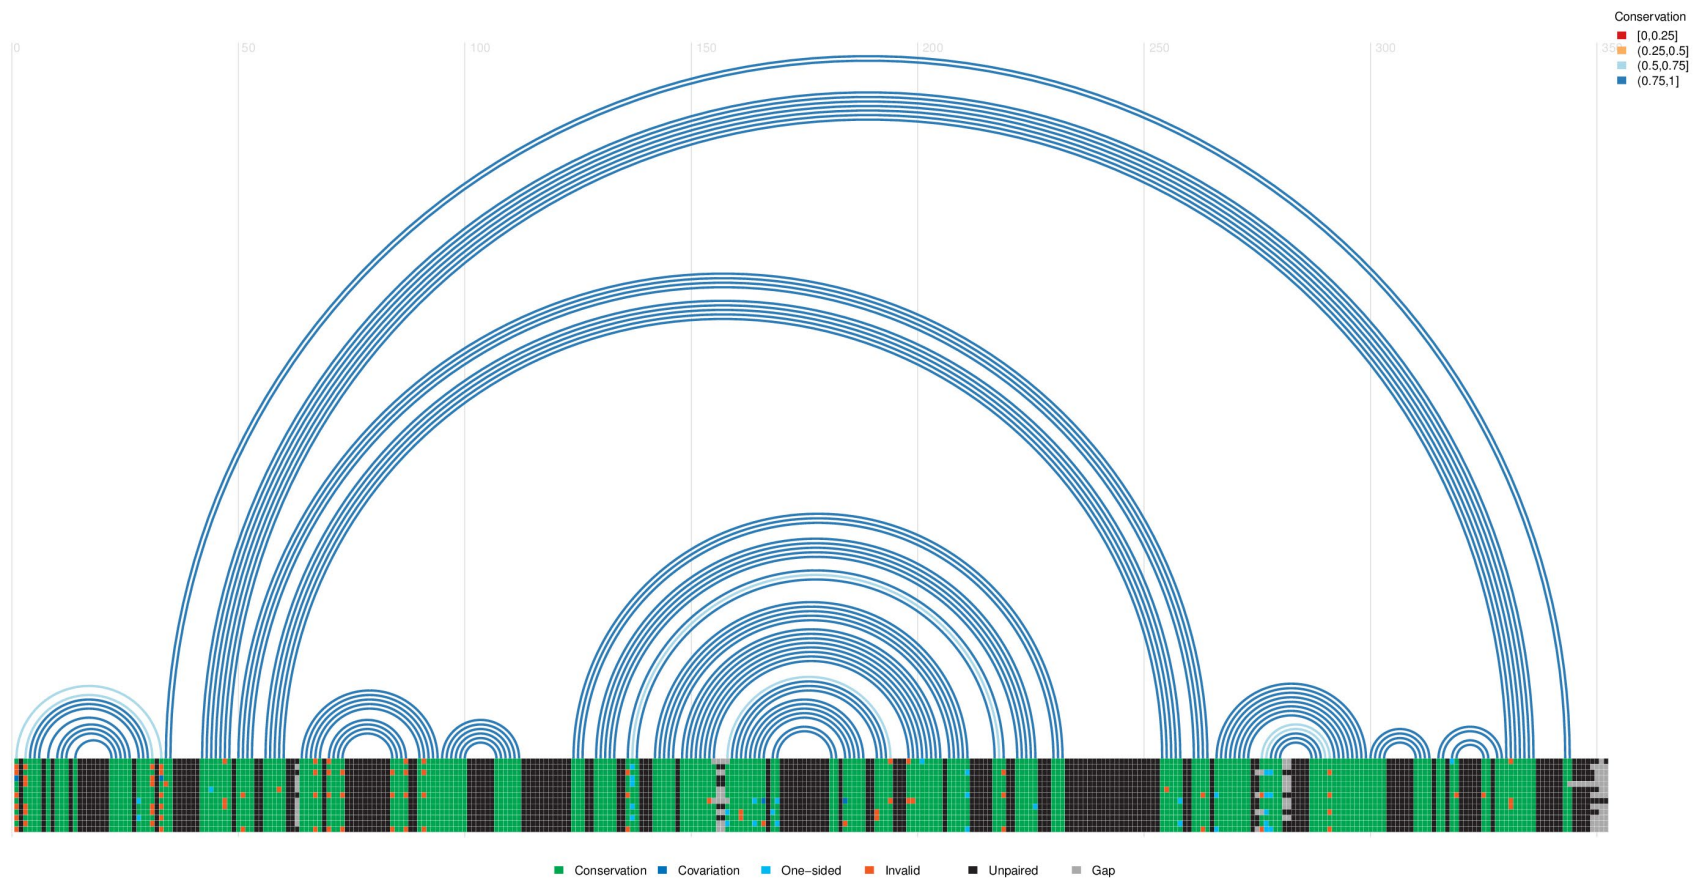

**Figure C. Extensive secondary structure is predicted in the *ESAG6*-3'UTR.** Simultaneous folding and alignment of the 13 *ESAG6* 3'UTRs was performed using LocARNA [2], with the predicted minimum free energy structure of the consensus sequence visualised using R-chie [3]. Arcs indicate the predicted base-pairing, coloured by the degree of sequence conservation. The coloured blocks at the base represent the alignment of the 13 *ESAG6* 3'UTRs coloured by the structural covariance.

## References:

1. Notredame C, Higgins D, Heringa J. T-Coffee: A novel method for multiple sequence alignment. *J Mol Biol.* 2000;302:205-17.
2. Will S, Joshi T, Hofacker IL, Stadler PF, Backofen R. LocARNA-P: accurate boundary prediction and improved detection of structural RNAs. *RNA.* 2012;18(5):900-14. Epub 2012/03/28. doi: 10.1261/rna.029041.111. PubMed PMID: 22450757; PubMed Central PMCID: PMC3334699.
3. Lai D, Proctor JR, Zhu JY, Meyer IM. R-CHIE: a web server and R package for visualizing RNA secondary structures. *Nucleic Acids Res.* 2012;40(12):e95. Epub 2012/03/22. doi: 10.1093/nar/gks241. PubMed PMID: 22434875; PubMed Central PMCID: PMC3384350.
